# Supplementary material
Source: ML conference proceedings conference paper supplement (https://openreview.net/forum?id=0aEUd9UtiA)

Plot of Loaded Data from .npy File

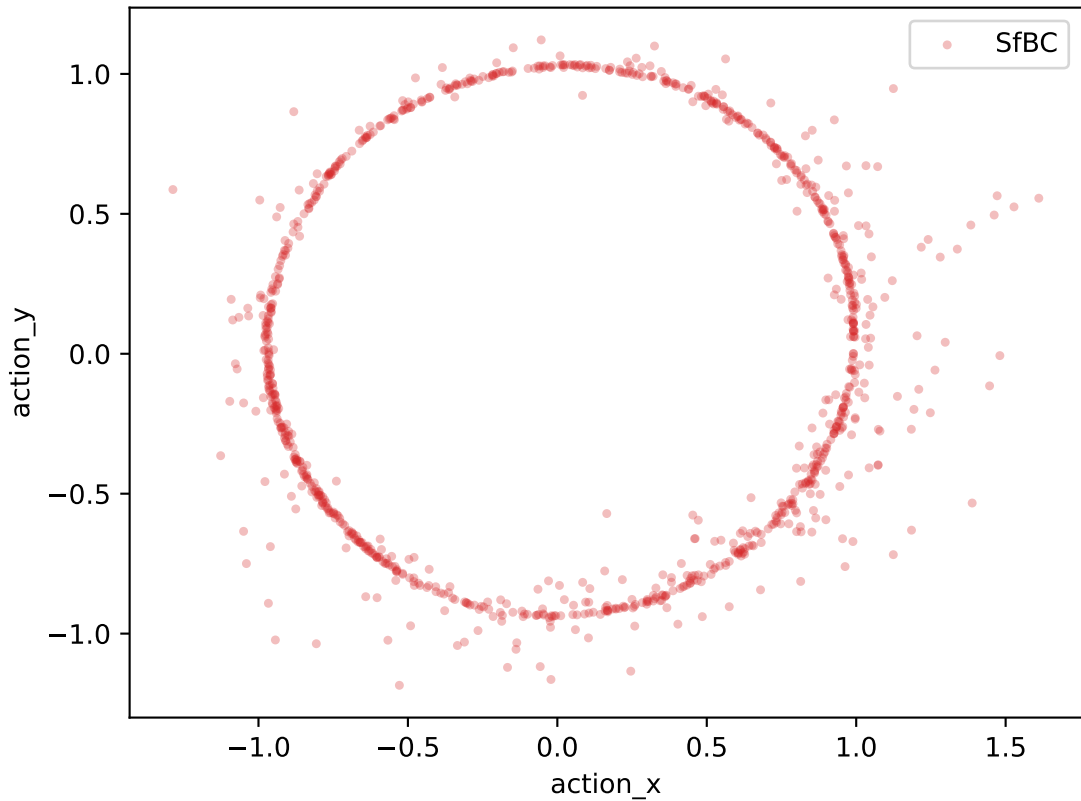

Supplement: supplementary_material [file attachment]

Ground Truth

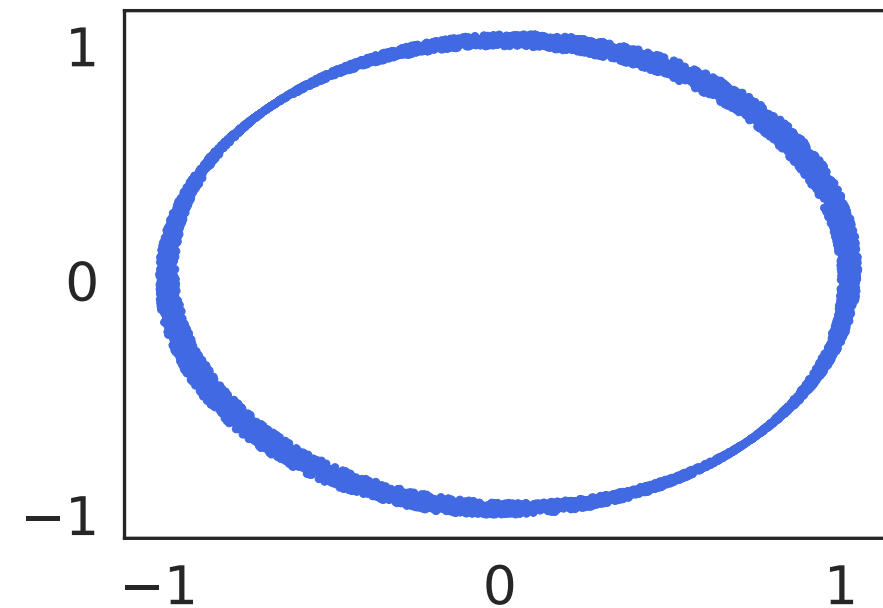

SfBC (T=15)

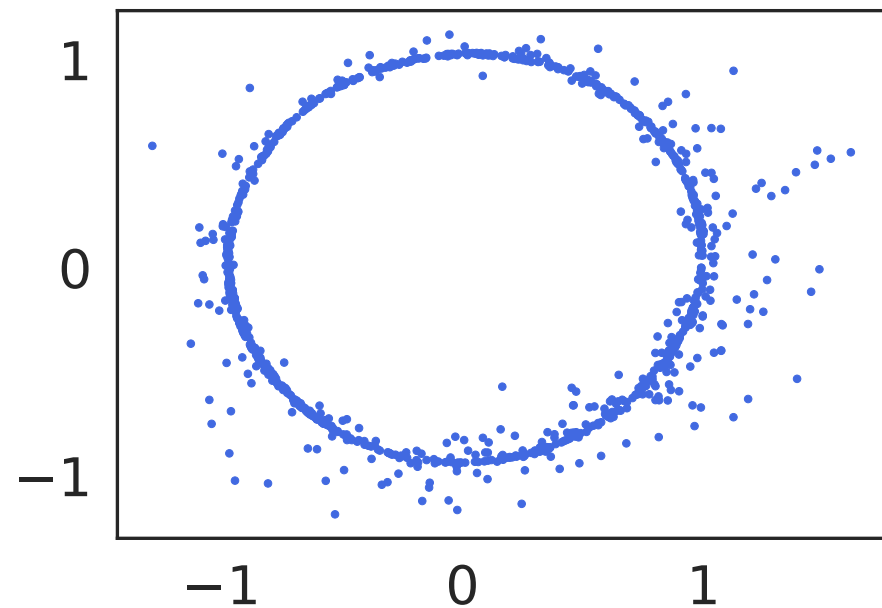

SfBC (T=25)

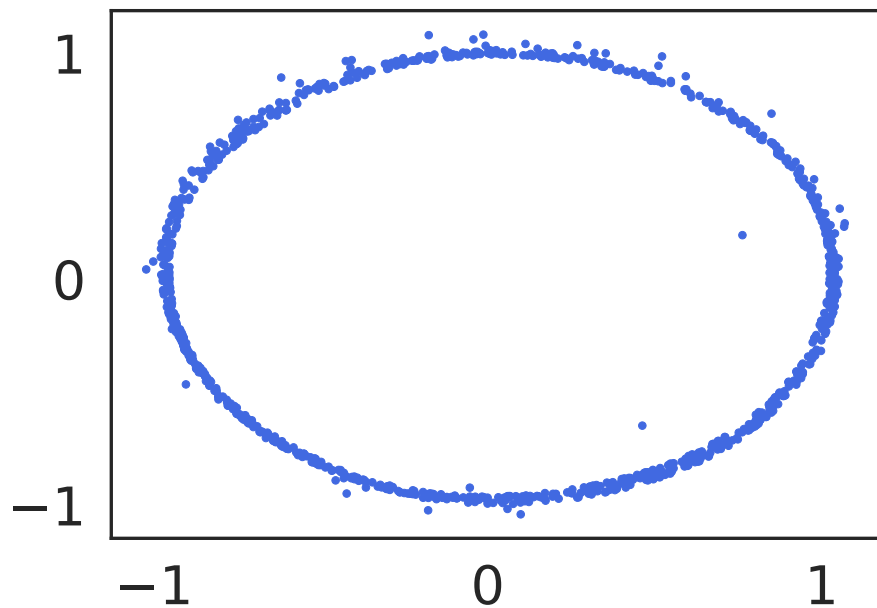

SfBC (T=30)

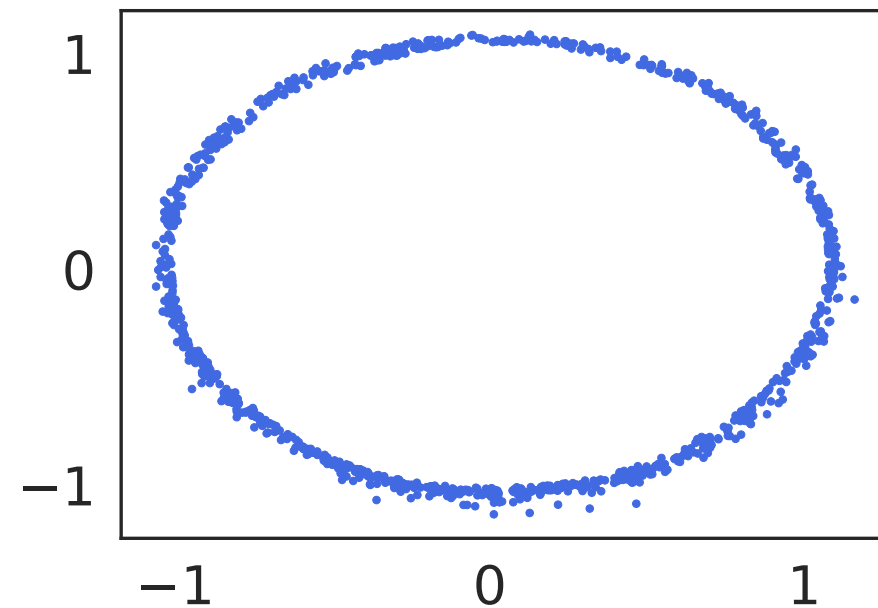

SfBC (T=50)

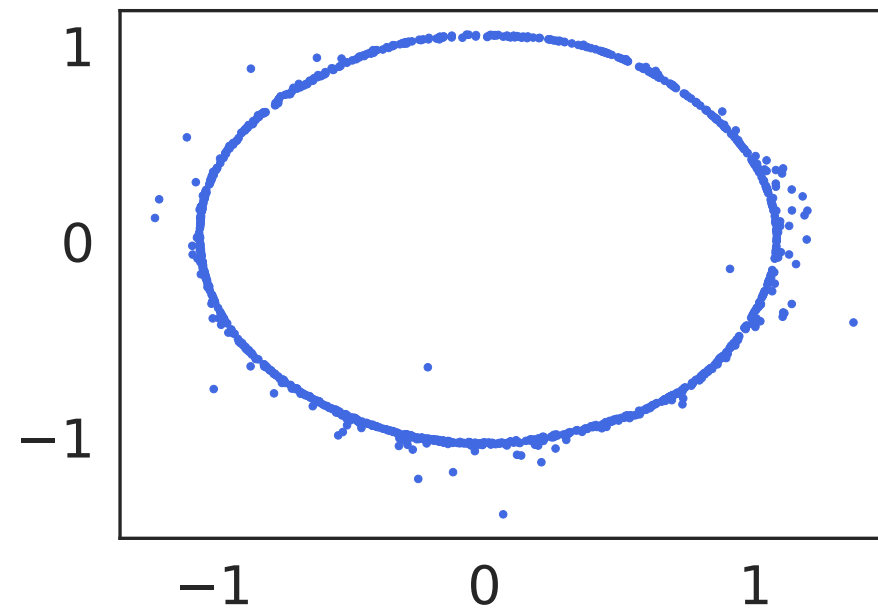

Supplement: supplementary_material [file attachment]

Ground Truth



DiffCPS (T=15)

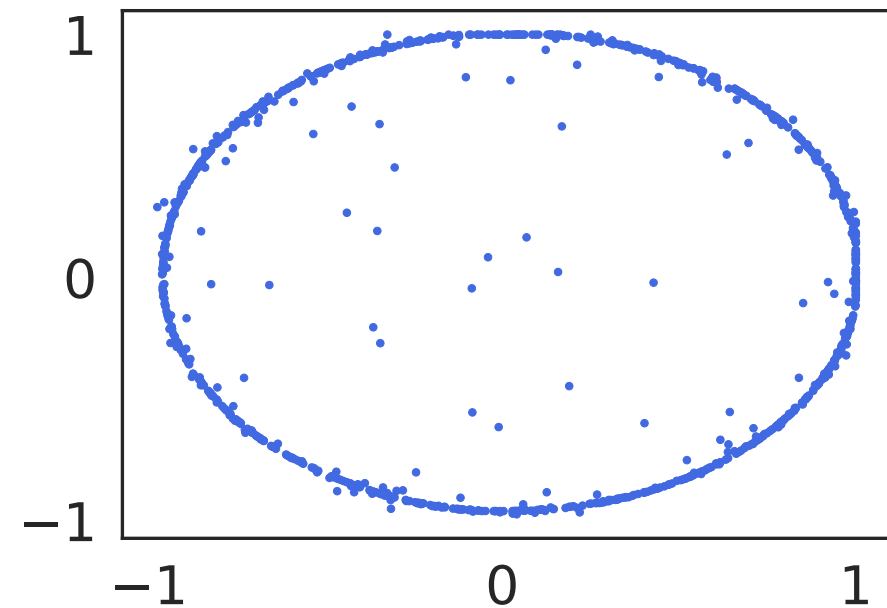

DiffCPS (T=25)

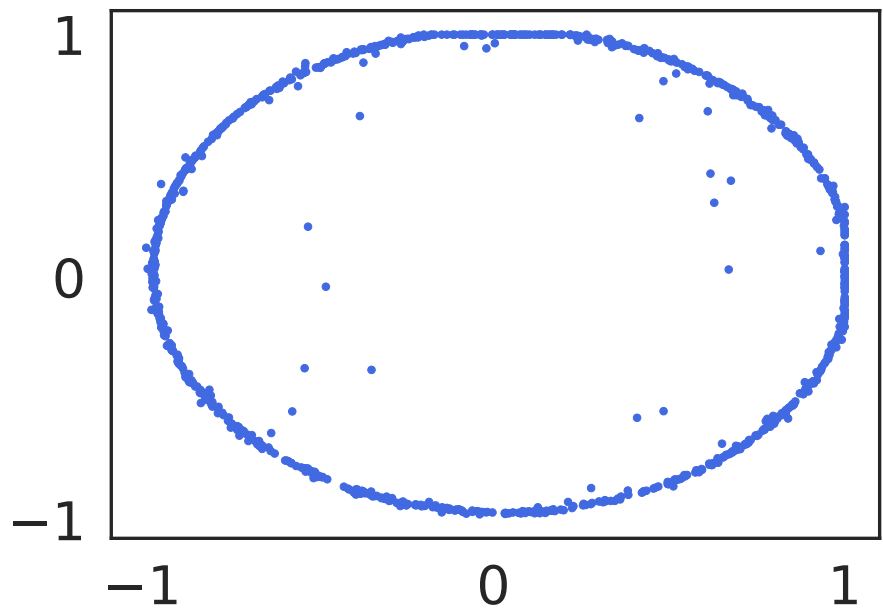

DiffCPS (T=30)

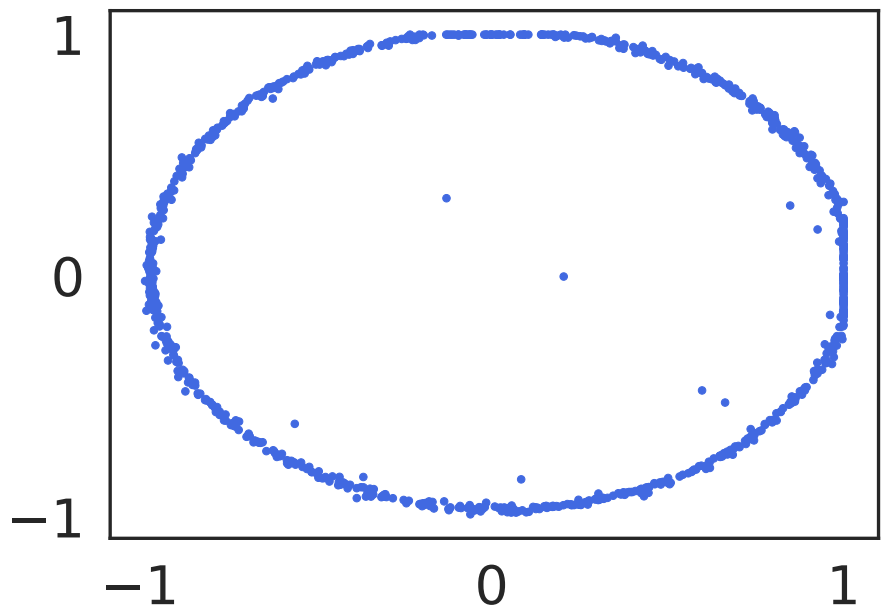

DiffCPS (T=50)

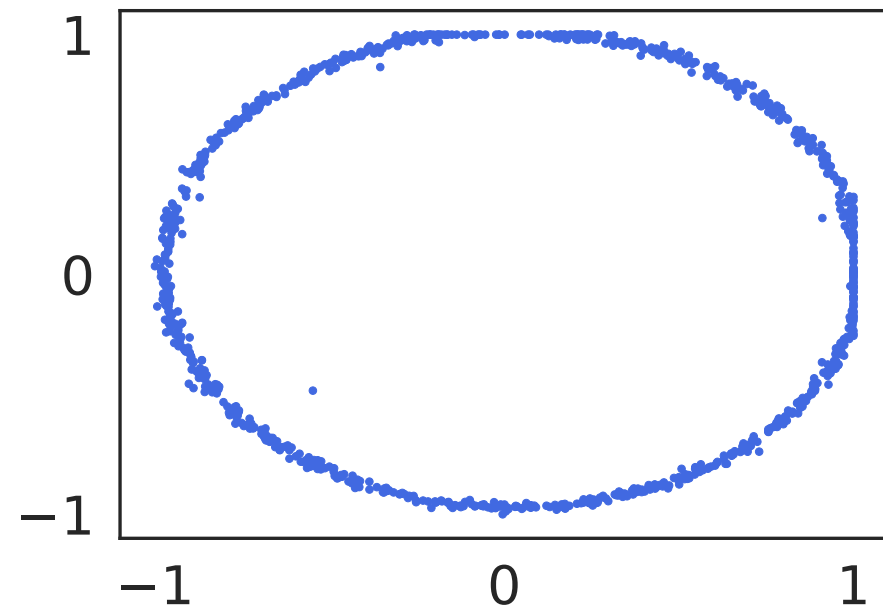

Supplement: supplementary_material [file attachment]

# Ground Truth

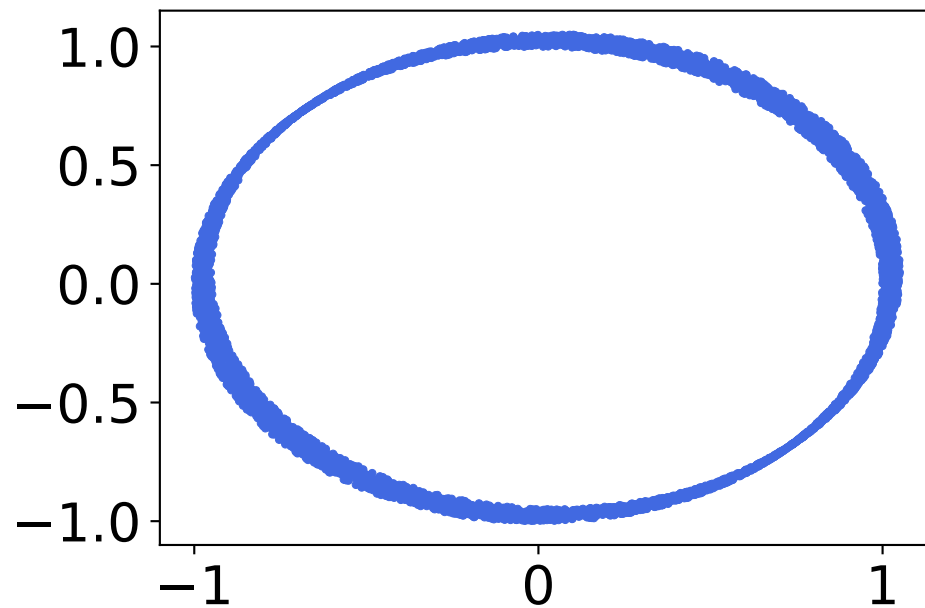

# DiffCPS (T=15)

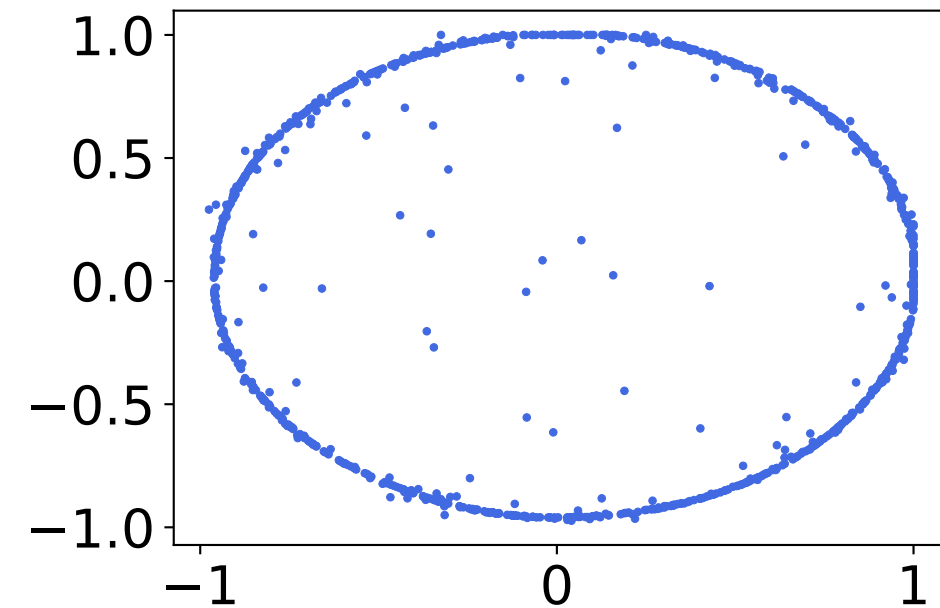

# BCQ

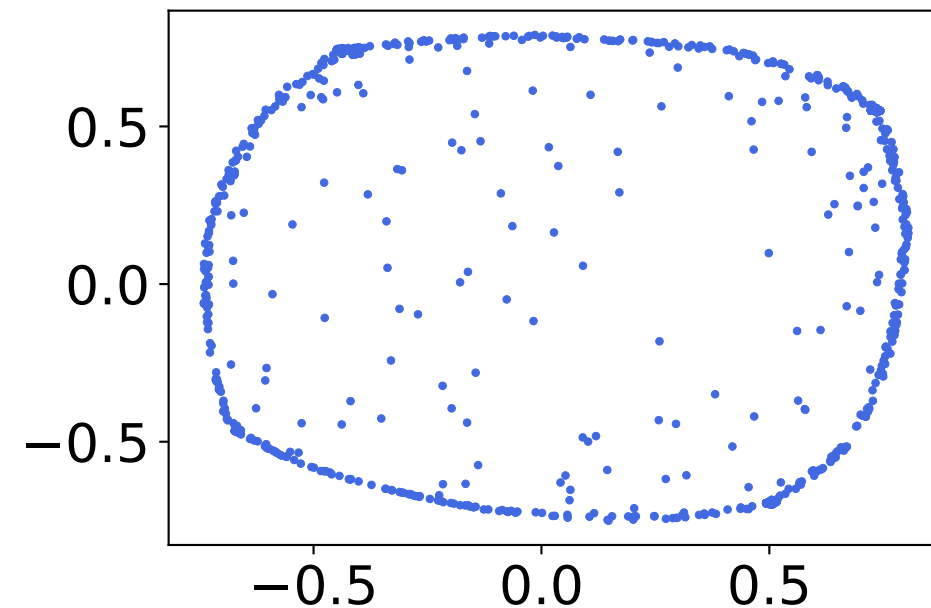

# TD3+BC

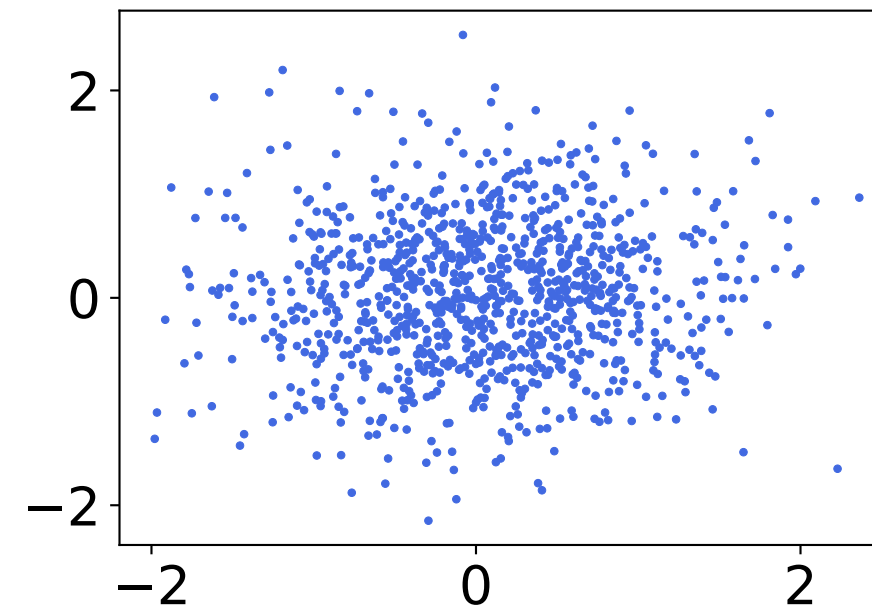

# BEAR

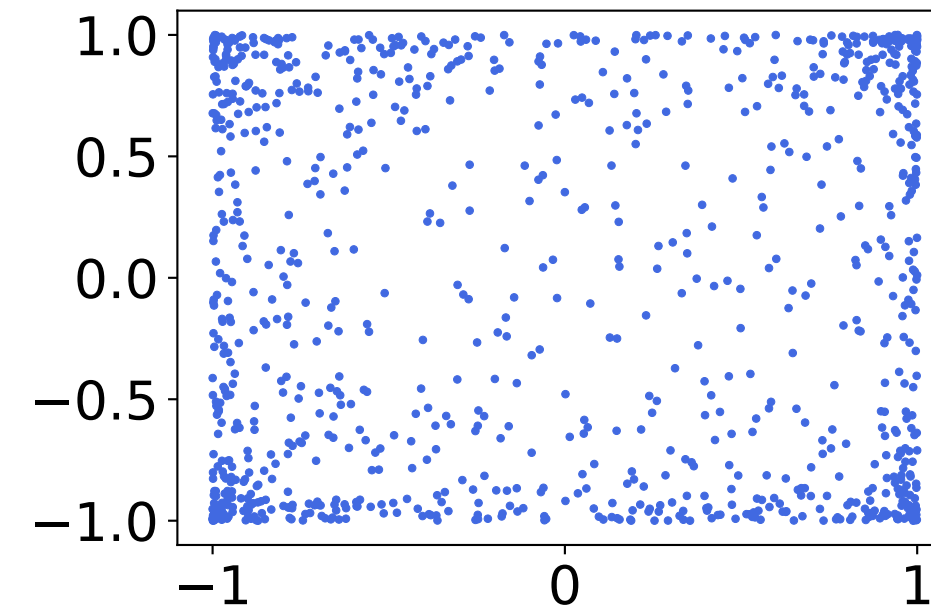

Supplement: supplementary_material [file attachment]

# Ground Truth



# DiffCPS (T=15)

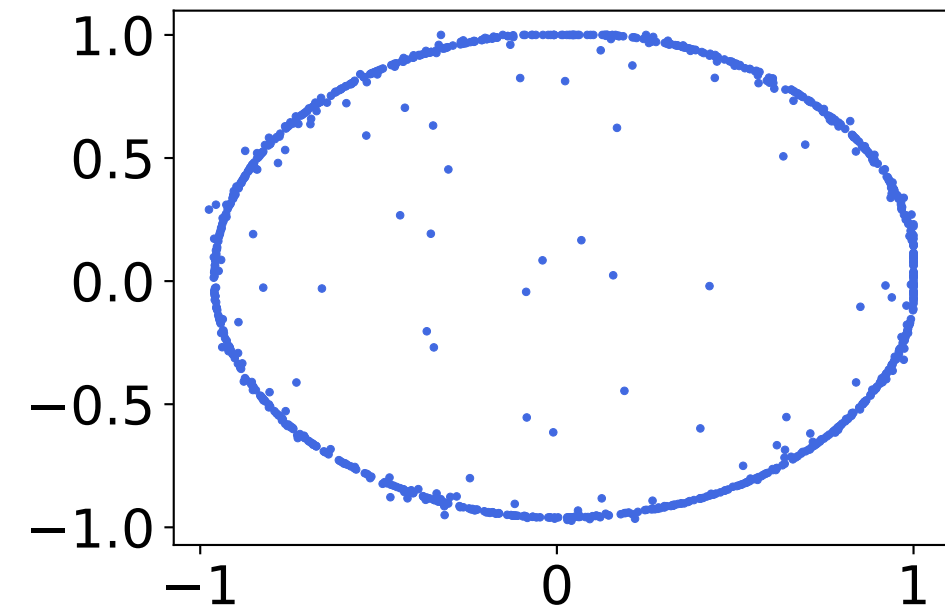

# AWR

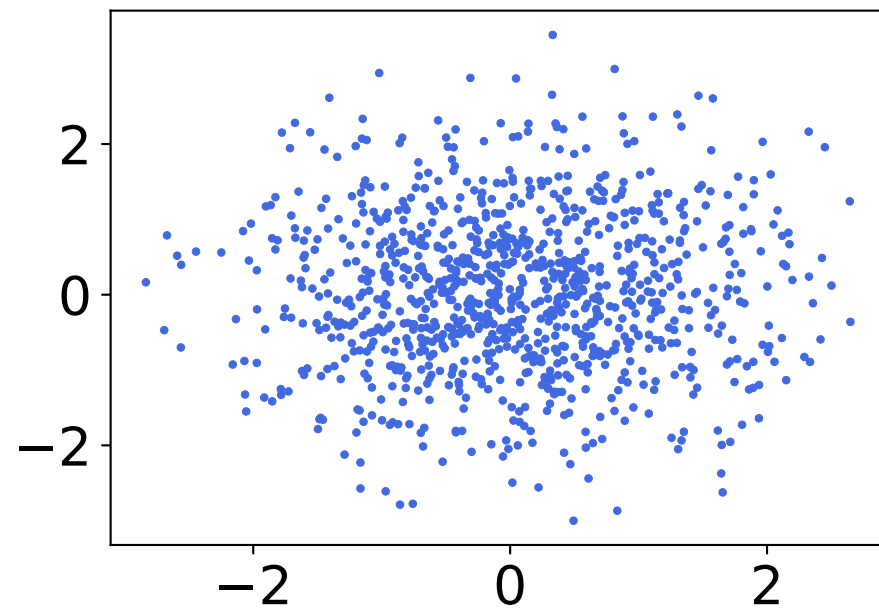

# DQL (T=15)

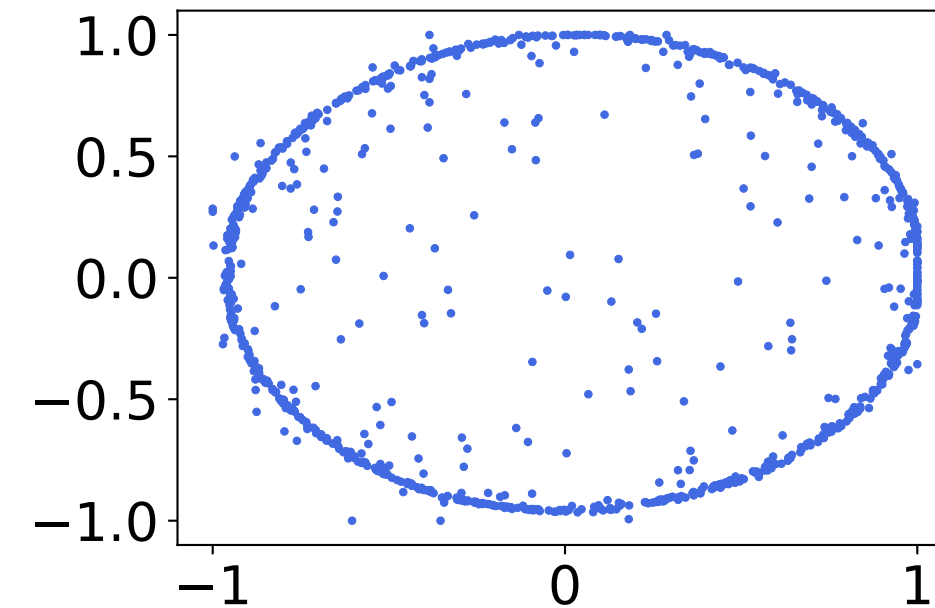

# SfBC (T=15)

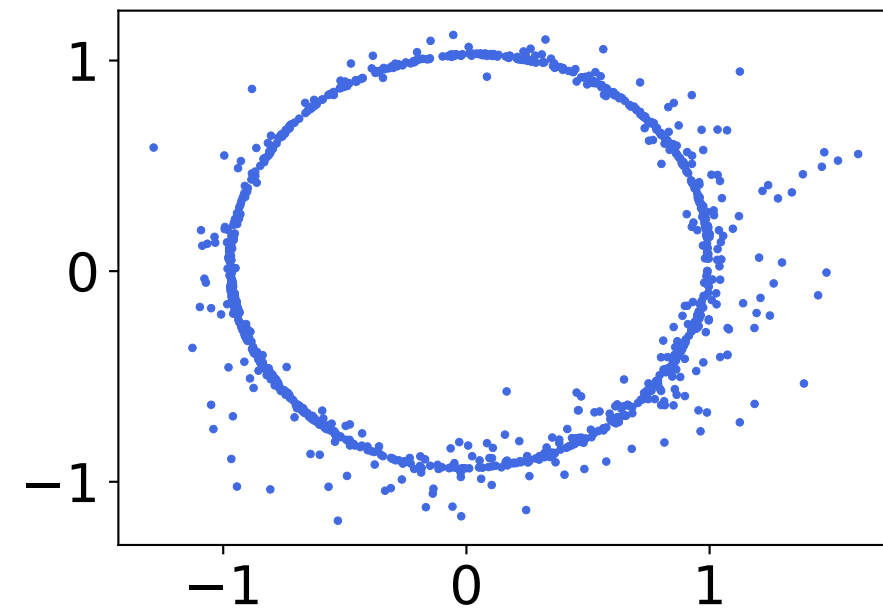

Supplement: supplementary_material [file attachment]

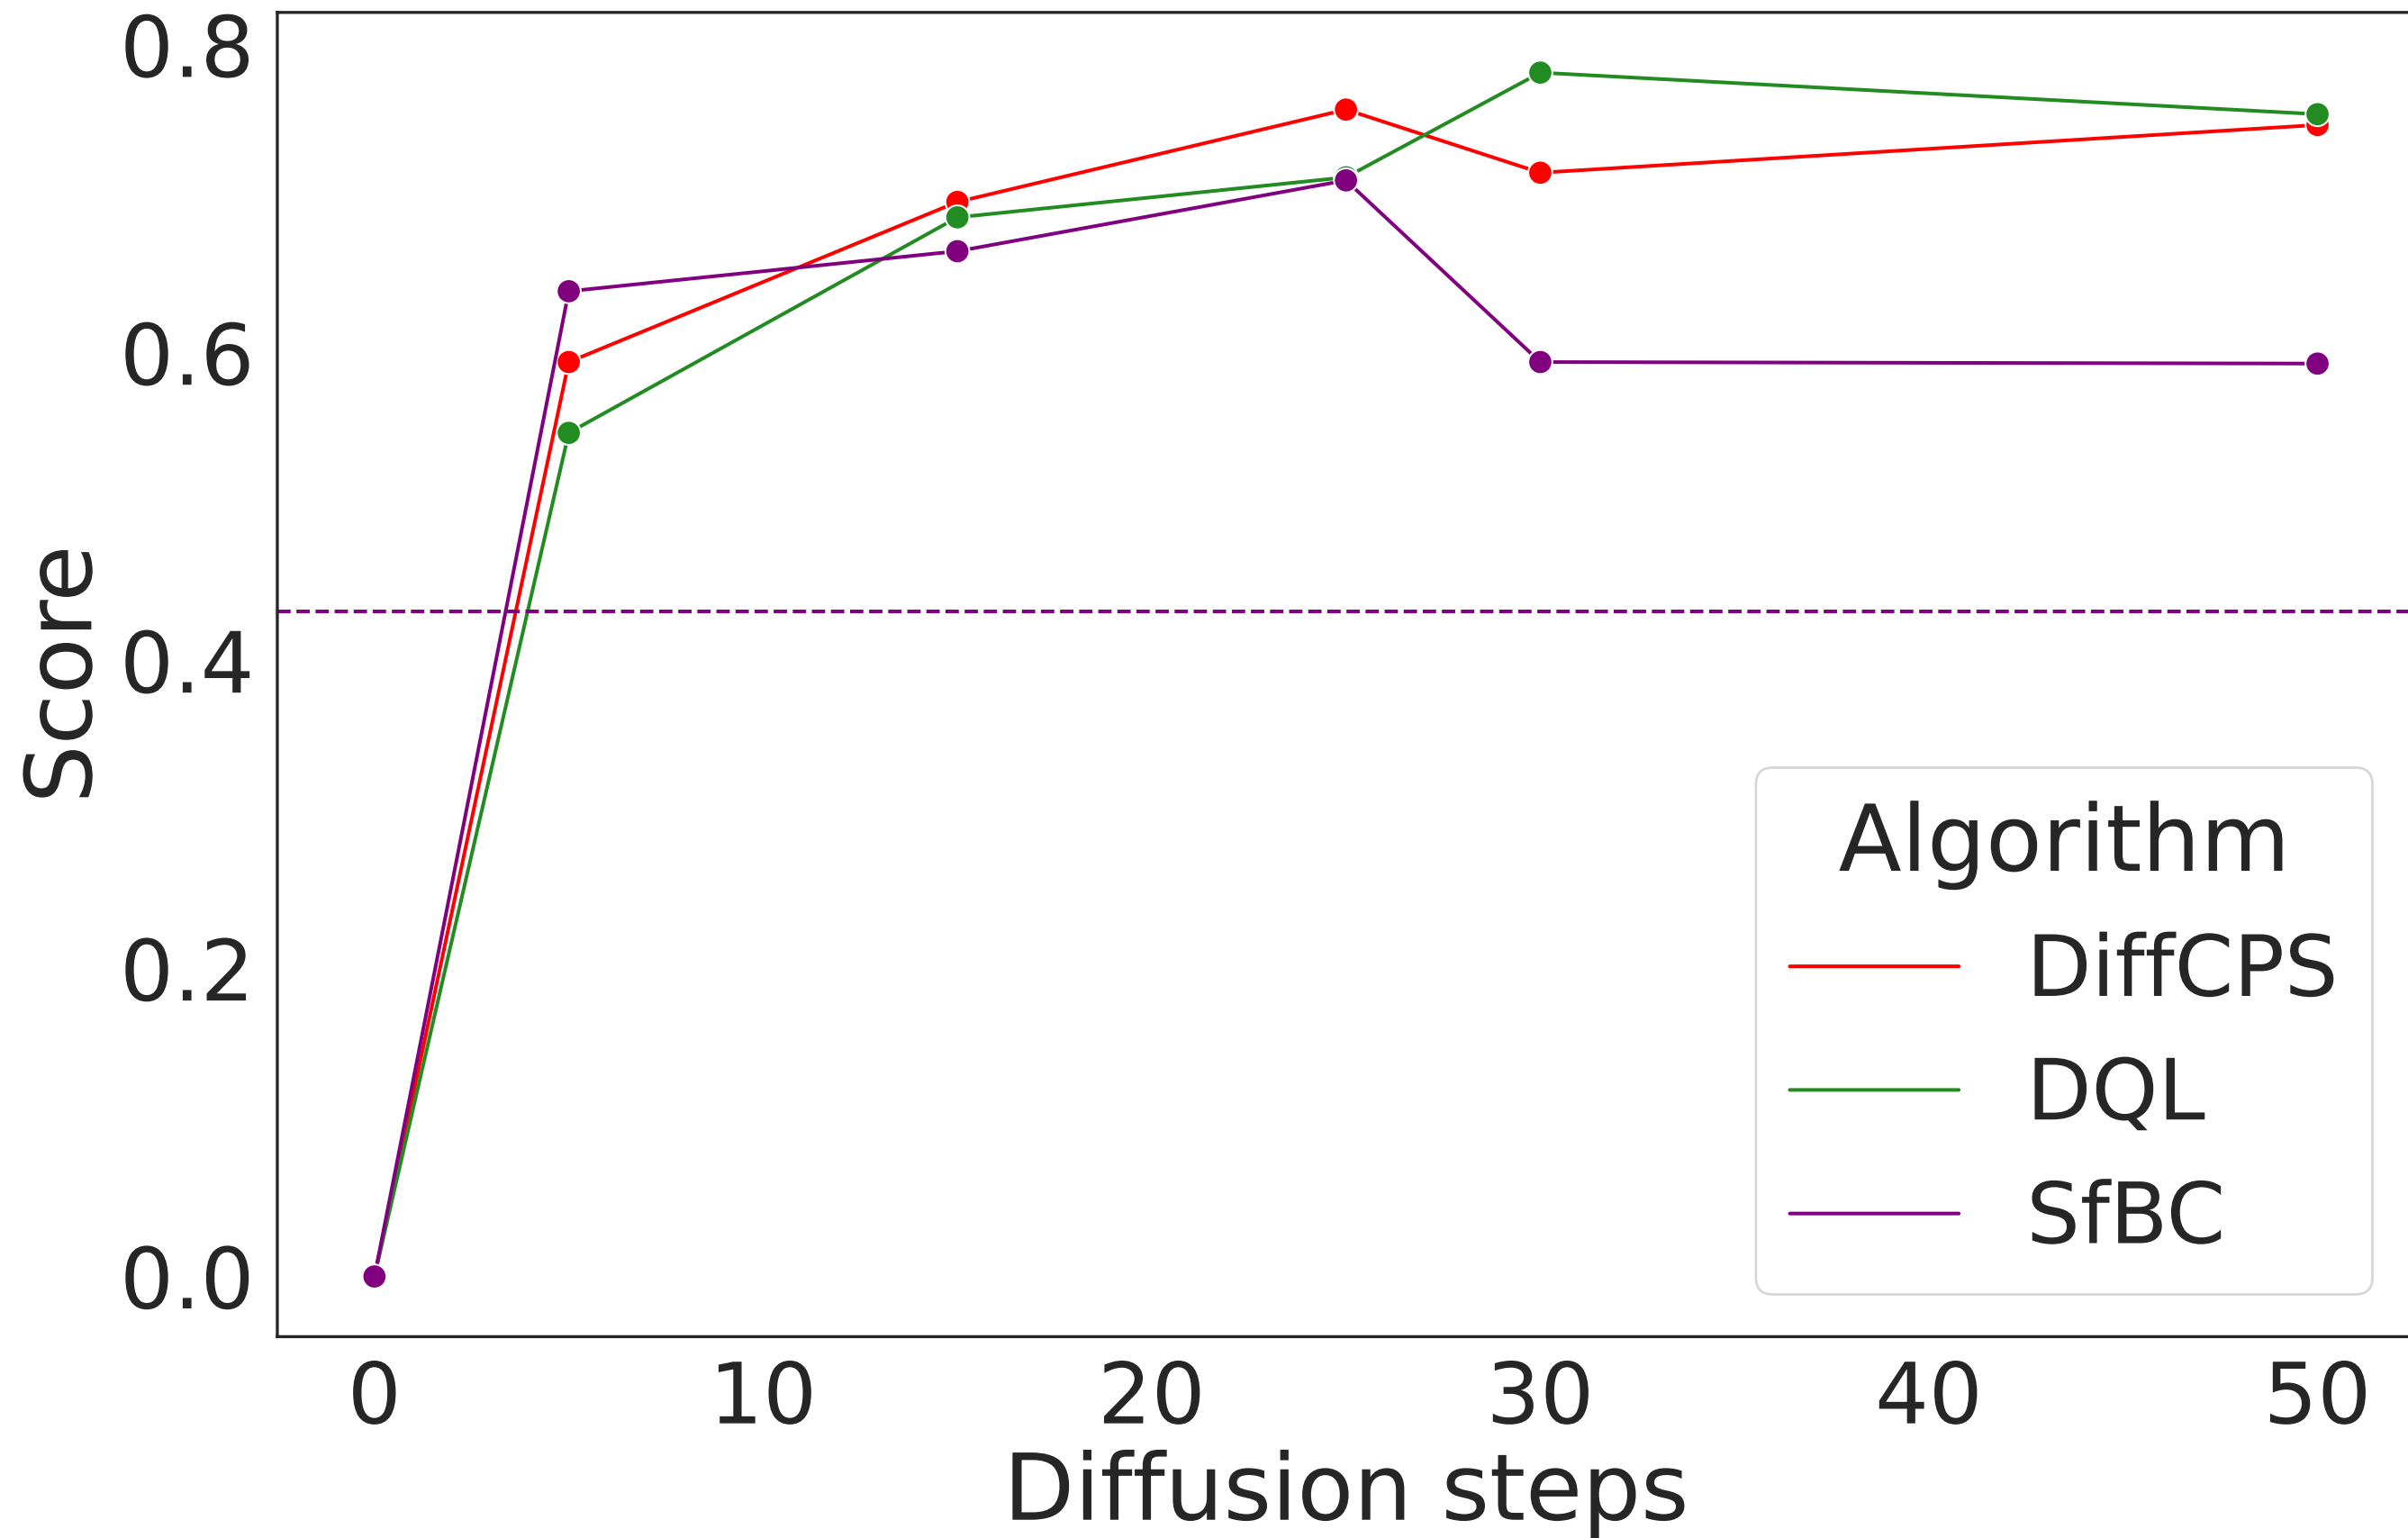

Supplement: supplementary_material [file attachment]

Ground Truth



DQL (T=15)

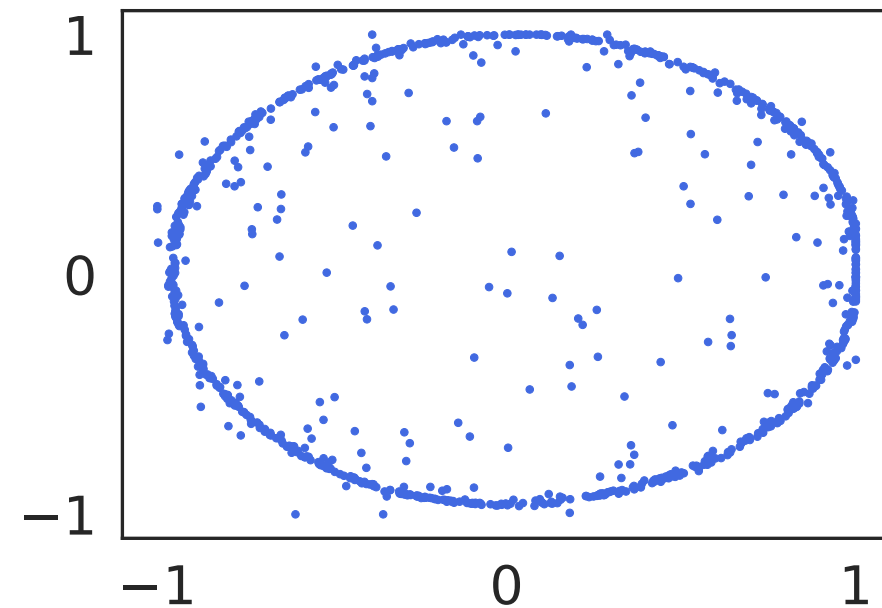

DQL (T=25)

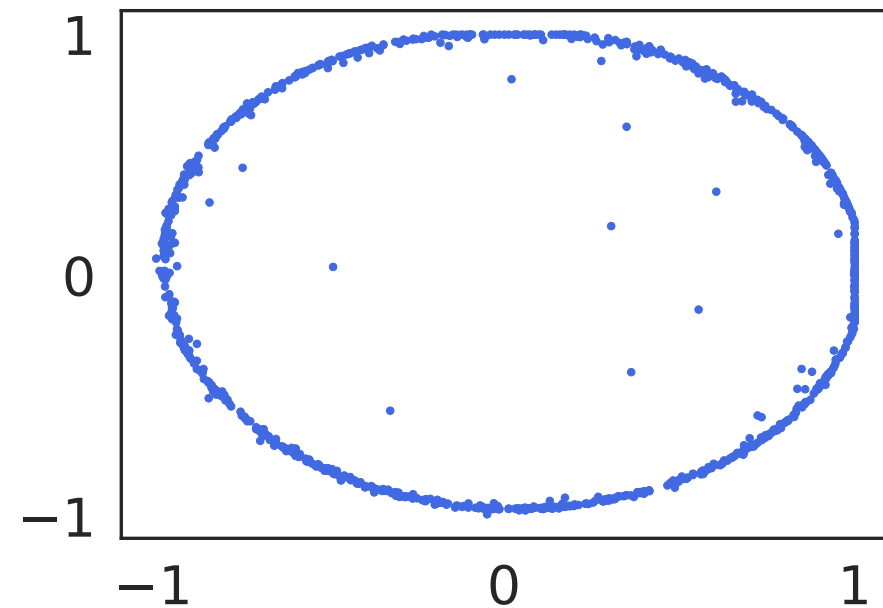

DQL (T=30)

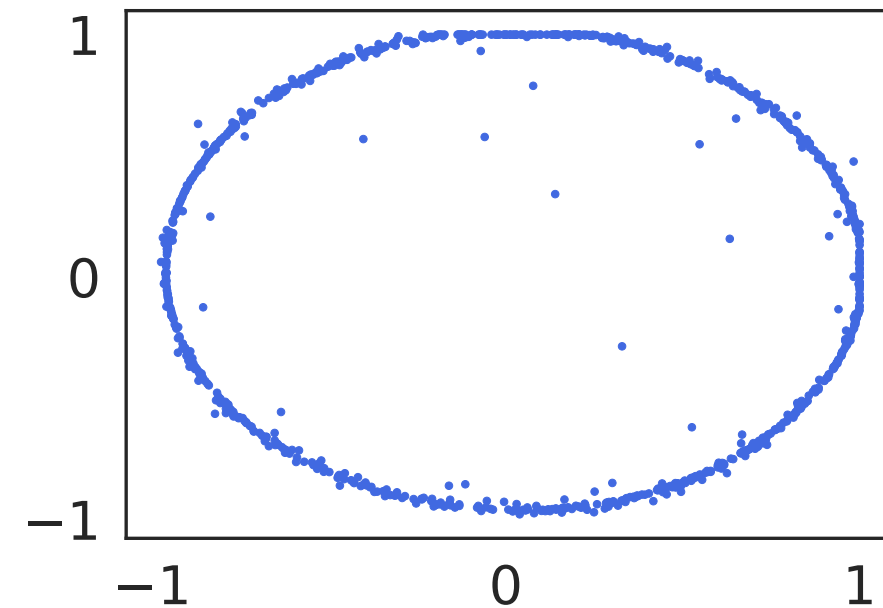

DQL (T=50)

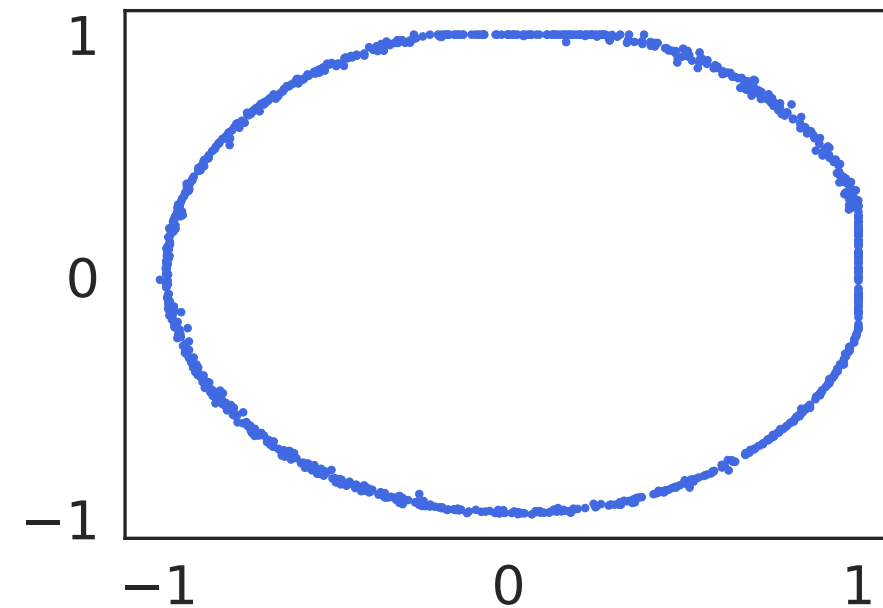

Supplement: supplementary_material [file attachment]

Ground Truth



Diffusion (T=15)

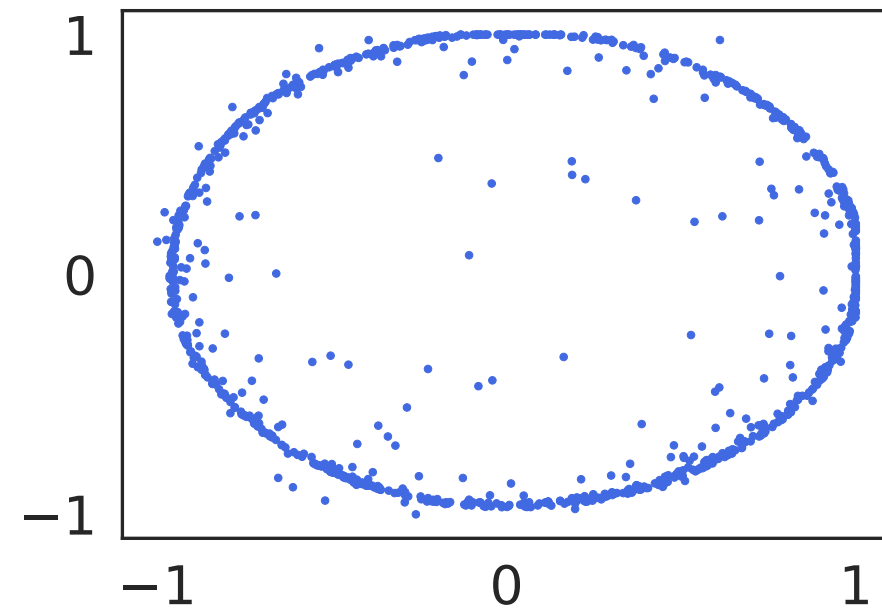

Diffusion (T=25)

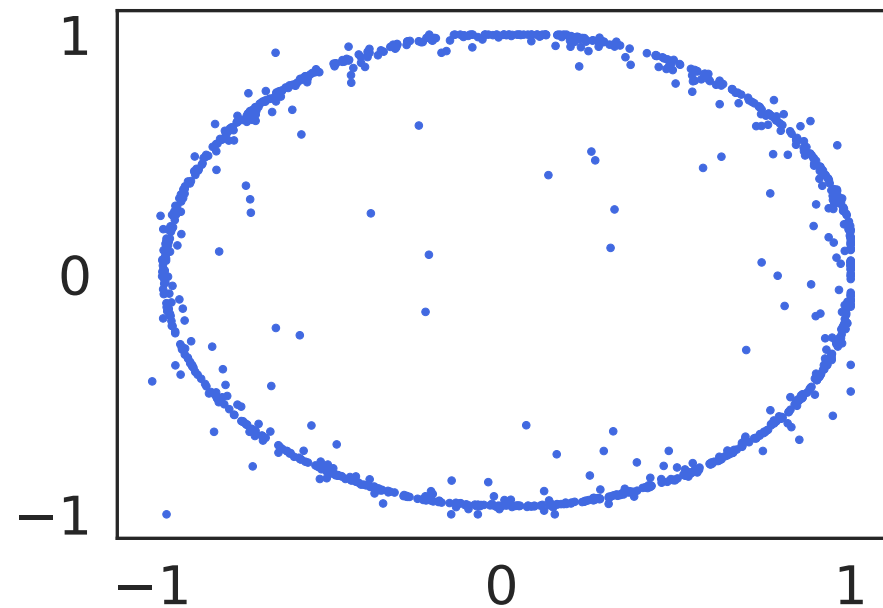

Diffusion (T=30)

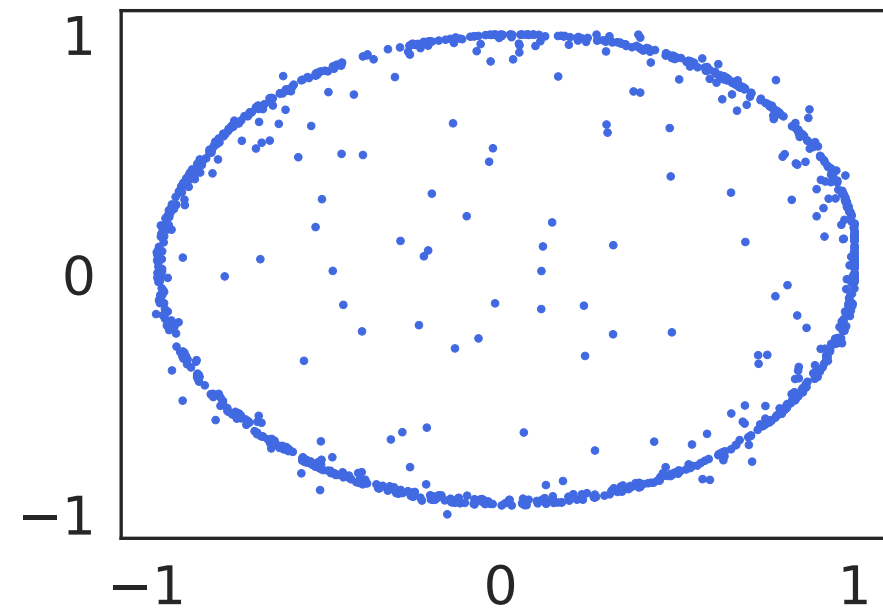

Diffusion (T=50)

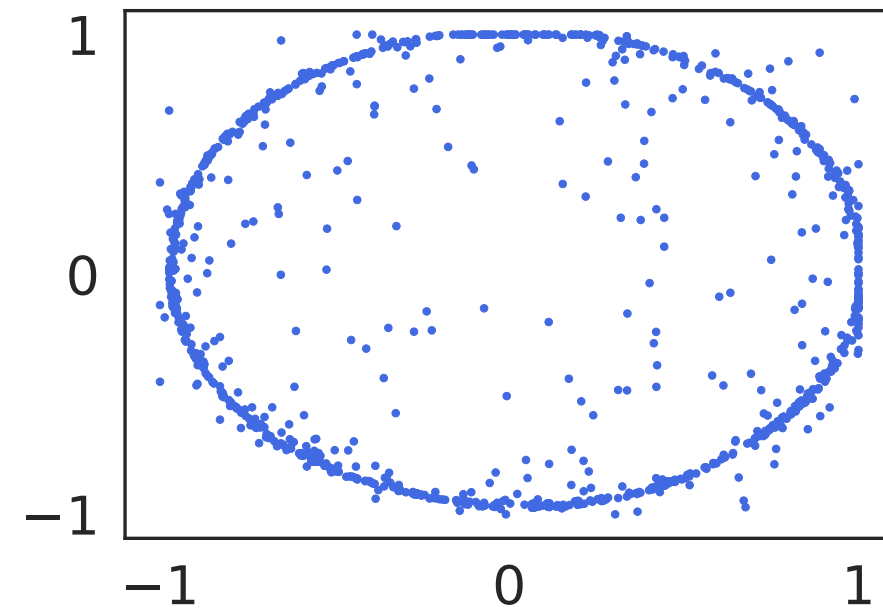

Supplement: supplementary_material [file attachment]
